# Supplementary material for: Facile method to synthesize a carbon layer embedded into titanium dioxide nanotubes with metal oxide decoration for electrochemical applications
Source: Royal Society of Chemistry journal article supplement (doi:10.1039/c5ta05691h), 2015-01-01
Supplement: c5ta05691h1.pdf [file c5ta05691h1.pdf]

# Facile Method to Synthesize Carbon Layer Embedded into Titanium Dioxide Nanotubes with Metal Oxide Decoration for Electrochemical Applications

Yan-Yan Song,<sup>a</sup> Ya-Hang Li,<sup>a</sup> Jing Guo,<sup>a</sup> Zhi-Da Gao,<sup>\*a</sup> and Ying Li<sup>\*b</sup>

<sup>a</sup>College of Science, Northeastern University, Wenhua Road 3-11, Shenyang, China, E-mail: [gaozd@mail.neu.edu.cn](mailto:gaozd@mail.neu.edu.cn)

<sup>b</sup>Jiangsu Province Hi-Tech Key Laboratory for Bio-medical Research, School of Chemistry and Chemical Engineering, Southeast University, Nanjing 210096, China, E-mail: [yingli@seu.edu.cn](mailto:yingli@seu.edu.cn)

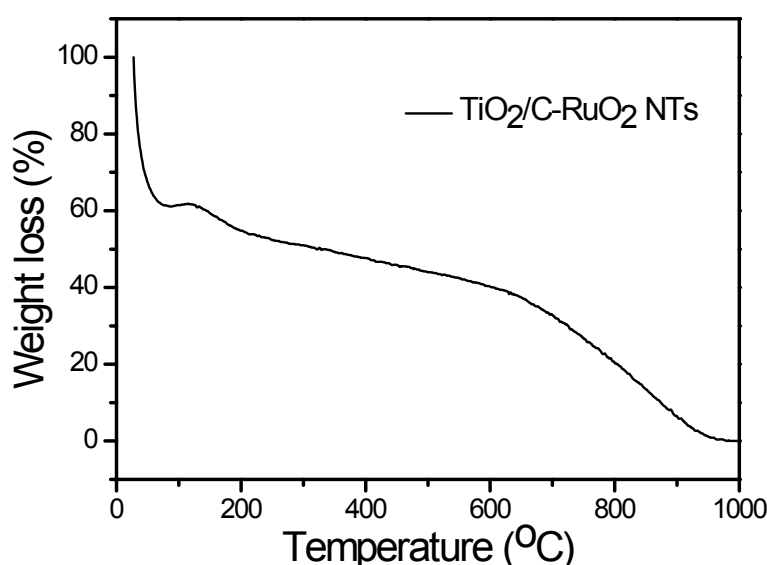

**Fig. S1.** Thermogram of TiO<sub>2</sub>/C-RuO<sub>2</sub>NTs taken under the flow of O<sub>2</sub> during the temperature ramp.

The thermal stability of TiO<sub>2</sub>/C-RuO<sub>2</sub>NTs was investigated by using the TGA technique. The first step of weight loss before 130 °C was attributed to the removal of the adsorbed water. The second weight loss from 200 to 650 °C was attributed to the transfer of TiO<sub>2</sub> crystalline from amorphous to anatase, the removal of crystalline water in hydrous ruthenium oxide and the subsequent burning of carbon layers.

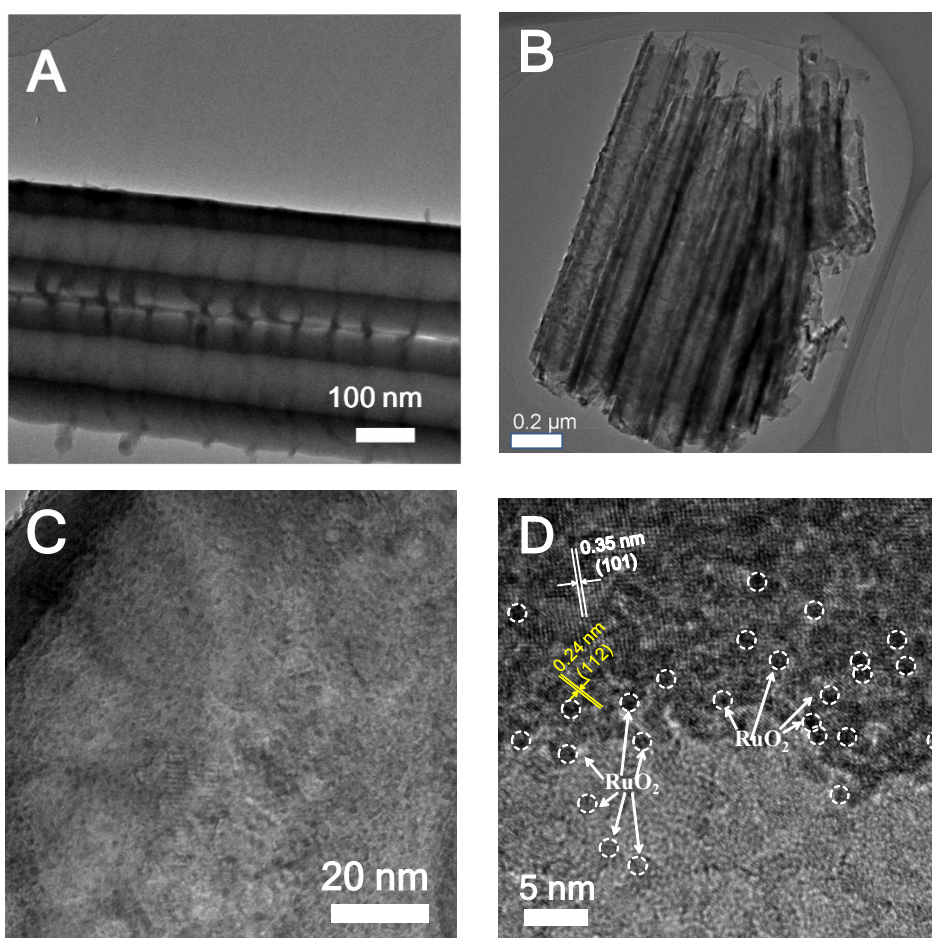

**Fig. S2.** TEM images of (A) the bare TiNTs before annealing, (B) bare TiNTs after annealing, (C) RuO<sub>2</sub> decorated C/TiNTs samples, and (D) the high-resolution image.

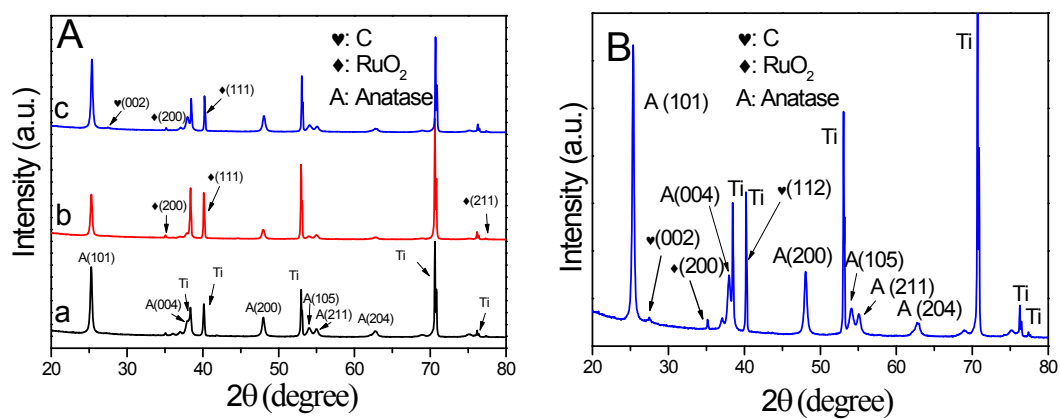

**Fig. S3.** XRD patterns for (A) bare anatase nanotubes (curve a), TiO<sub>2</sub>-RuO<sub>2</sub> NTs (curve b), and TiO<sub>2</sub>/C-RuO<sub>2</sub>NTs (curve c), and (B) the details for TiO<sub>2</sub>/C-RuO<sub>2</sub>NTs.

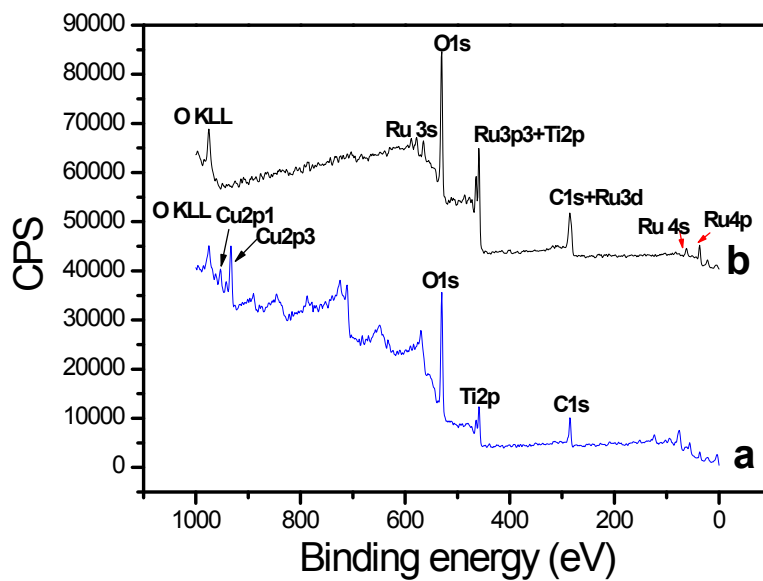

**Fig. S4.** XPS spectra of the TiO<sub>2</sub>/C NTs samples after decorating by Cu nanoparticles (curve a), and after the RuO<sub>2</sub> formed by galvanic displacement of Cu (curve b).

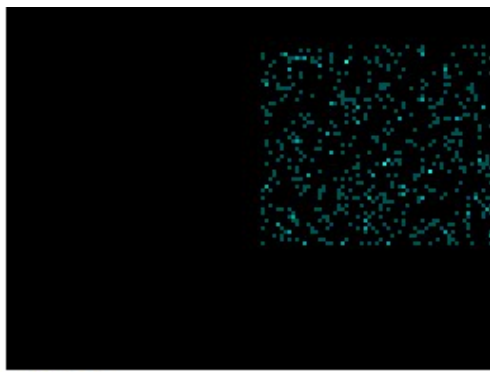

C Ka1\_2

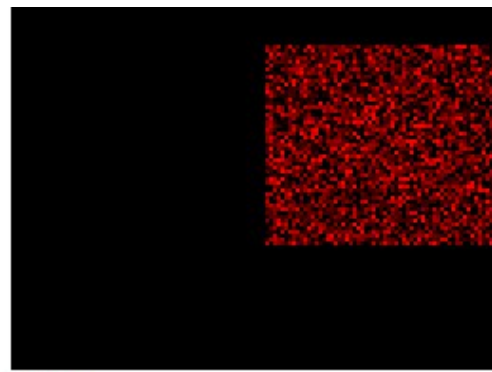

Ti Ka1

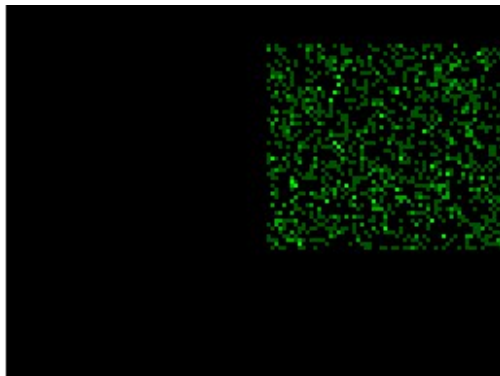

Ru La1

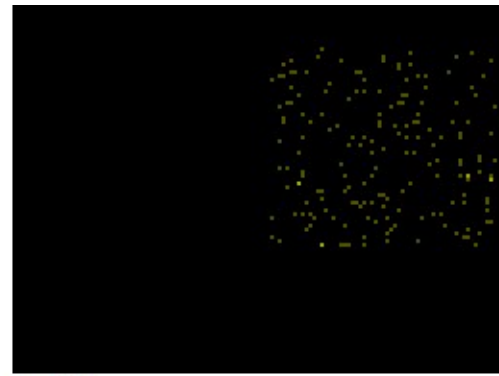

Cu Ka1

| Element | wt%   | atm%  |
|---------|-------|-------|
| Ti      | 54.60 | 29.00 |
| O       | 40.35 | 64.16 |
| C       | 2.90  | 6.14  |
| S       | 0.27  | 0.22  |
| Cu      | 0.04  | 0.02  |
| Ru      | 1.85  | 0.46  |

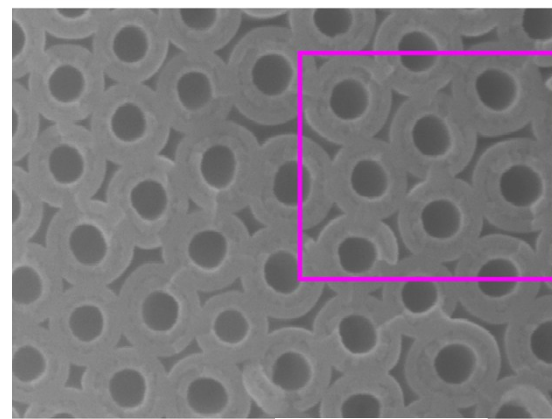

SEM image

**Fig. S5.**EDS analysis on cross-section of tubes. Rectangle indicate the EDS mapping area.

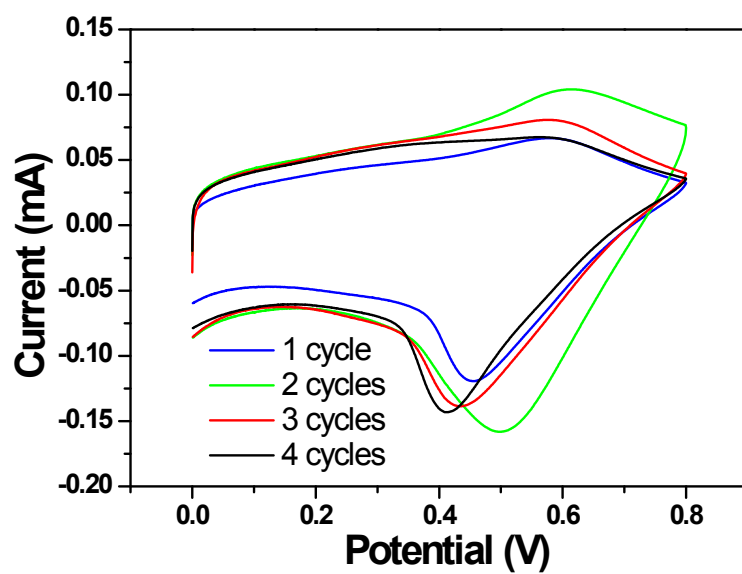

**Fig. S6.** The influence of the number of PSS-Cu<sup>2+</sup> bilayers during LBL process on the electrochemical currents of TiO<sub>2</sub>/C-RuO<sub>2</sub>NTs based electrodes.

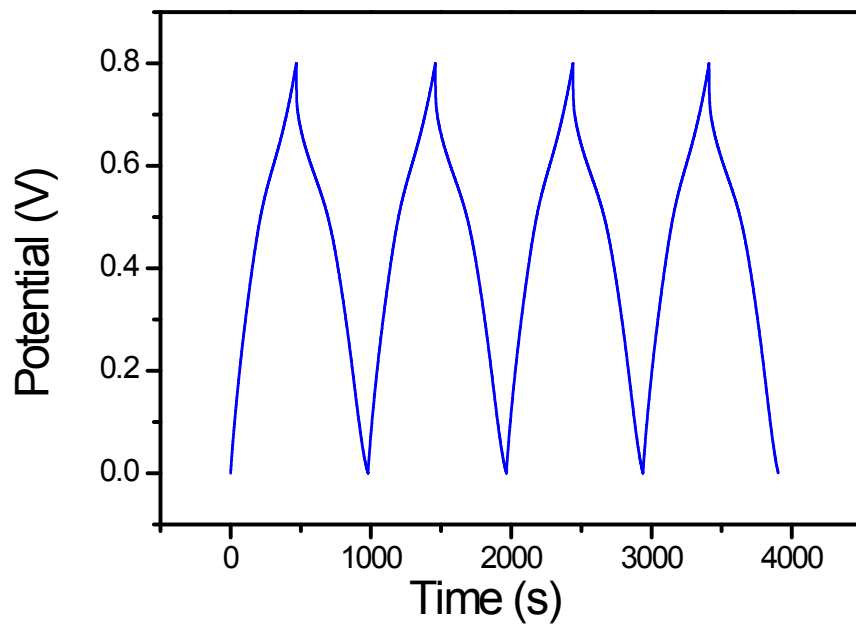

**Fig. S7.** Typical charge-discharge cycle curves of the TiO<sub>2</sub>/C-RuO<sub>2</sub>NTs obtained at current density of 0.05 mAcm<sup>-2</sup>.

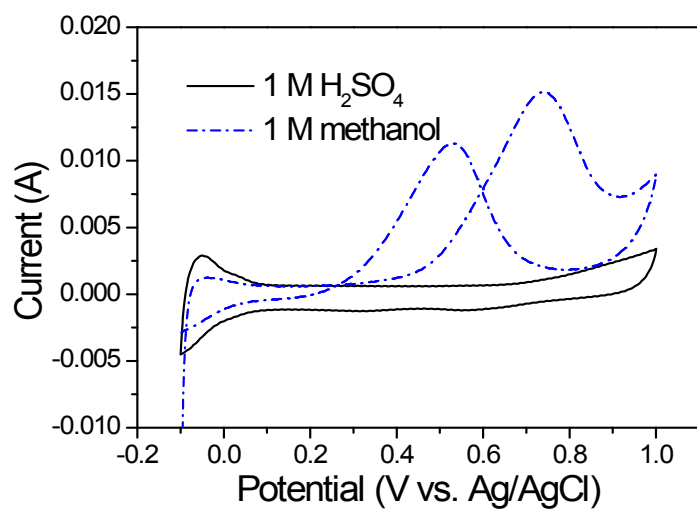

**Fig. S8.** Cyclic voltammograms of TiO<sub>2</sub>/C-PtNTs samples in a 1 M H<sub>2</sub>SO<sub>4</sub> and 1 M CH<sub>3</sub>OH + 1M H<sub>2</sub>SO<sub>4</sub> solution at a scan rate of 50 mV s<sup>-1</sup>.
